# Supplementary material
Source: PubMed Central journal article supplement (PMC3163863)
Supplement: SD2.pdf [file SD2.pdf]

The following are supplemental materials and will be published online only

SUPPLEMENTAL TABLE 1  
Nucleotide and amino acid identity within M segment of Chinese and European TAHV isolates

|                      | Identity                       |                                             |                                 |
|----------------------|--------------------------------|---------------------------------------------|---------------------------------|
|                      | Among the Chinese isolates (%) | Between Chinese isolates and the others (%) | Among the European isolates (%) |
| Whole M CDS sequence | 81.4–96.3                      | 71.7–82.8                                   | 98–99.99                        |
| Whole M AA sequence  | 92.6–99                        | 92.4–94.5                                   | 98.5–99.99                      |
| 5'UTR NT sequence    | 95.1–100                       | 88.5–100                                    | 96.7–100                        |
| Gn NT sequence       | 82.5–97                        | 81.5–85.3                                   | 98.1–100                        |
| G2 AA sequence       | 97.9–100                       | 97.9–98.6                                   | 99.3–100                        |
| NSm NT sequence      | 82.4–96.2                      | 79.9–81.6                                   | 97.1–99.8                       |
| NSm AA sequence      | 94.8–99.4                      | 89.7–93.1                                   | 97.7–100                        |
| Gc NT sequence       | 80.1–96.1                      | 78.8–81.5                                   | 97.9–99.8                       |
| Gc AA sequence       | 91.1–98.8                      | 91.1–93.7                                   | 98.3–99.9                       |
| 3'UTR NT sequence    | 93.7–97.2                      | 93–95.1                                     | 97.2–100                        |

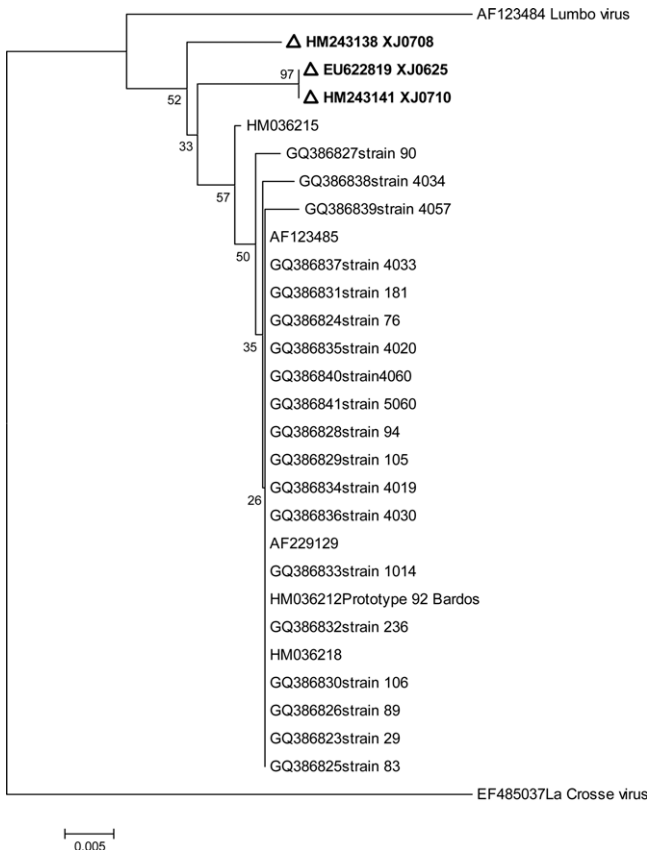

SUPPLEMENTAL FIGURE 1. Phylogenies of Tahyna virus using amino acid sequence of Gn. Distances and groupings were determined by the p-distance algorithm and neighbor-joining method with MEGA version 4 software (www.megasoftware.net). Bootstrap values are indicated and correspond to 1,000 replications. Virus names or isolate designations are listed with GenBank Accession numbers given in parentheses. The tree was rooted by using Bunyamwera virus as the outgroup virus. Scale bars indicate a genetic distance of 0.05-nt substitutions per position.

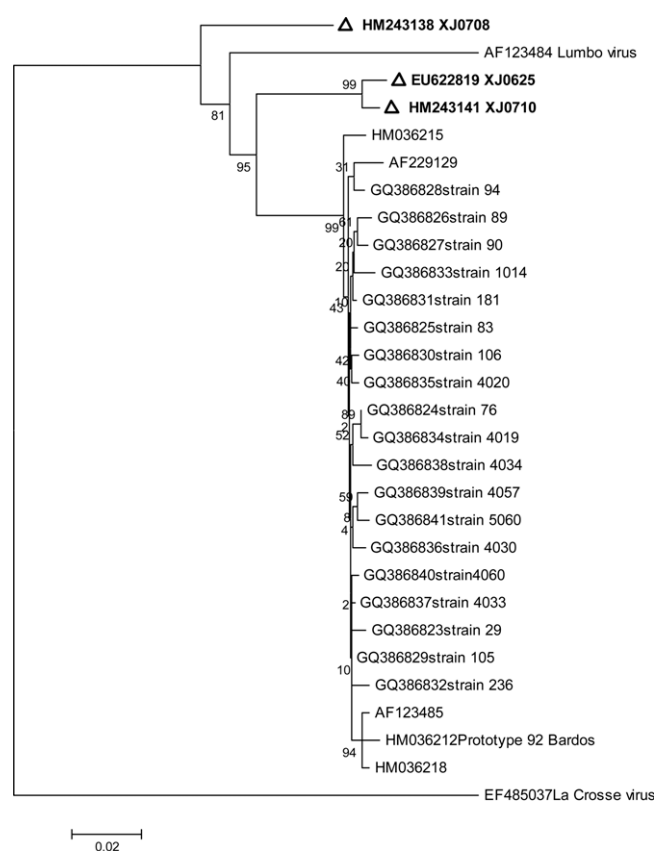

SUPPLEMENTAL FIGURE 2. Phylogenies of Tahyna virus using amino acid sequence of Gc. Distances and groupings were determined by the p-distance algorithm and neighbor-joining method with MEGA version 4 software (www.megasoftware.net). Bootstrap values are indicated and correspond to 1,000 replications. Virus names or isolate designations are listed with GenBank Accession numbers given in parentheses. The tree was rooted by using Bunyamwera virus as the outgroup virus. Scale bars indicate a genetic distance of 0.05-nt substitutions per position.

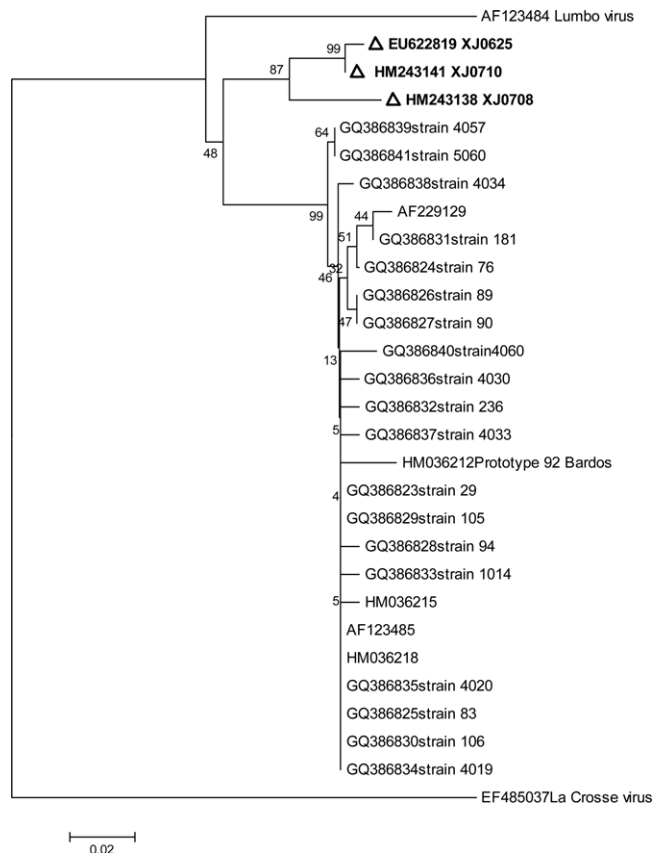

SUPPLEMENTAL FIGURE 3. Phylogenies of Tahyna virus using amino acid sequence of NSm. Distances and groupings were determined by the p-distance algorithm and neighbor-joining method with MEGA version 4 software ([www.megasoftware.net](http://www.megasoftware.net)). Bootstrap values are indicated and correspond to 1,000 replications. Virus names or isolate designations are listed with GenBank Accession numbers given in parentheses. The tree was rooted by using Bunyamwera virus as the outgroup virus. Scale bars indicate a genetic distance of 0.05-nt substitutions per position.
